# Supplementary material
Source: Springer Nature journal article supplement (https://www.springermedizin.de/resource/supplementary/12889_2012_4543_MOESM1_ESM.pdf/9492224)
Supplement: MOESM1 [file 9492224]

Send precontact letter and information update form

*2 weeks*

Send Introductory Packet

Introductory Letter

Pregnancy Calendar

Pesticide Card

Reimbursement Check

*MQ only:* questionnaire

*CATI only:* call preference form

Prepaid, stamped return envelope

*1 week if  
interview*

*2 weeks if  
questionnaire*

Conduct reminder call cycle. If unable to contact subject after call attempts, send reminder letter

*2 weeks*

If no response, repeat reminder call cycle. If unable to contact after call attempts, resend reminder letter

*2 weeks*

If no response, send decision letter (MQ only: resend questionnaire) and information update form. If study staff have not had direct contact with subject, send letter via certified mail.

*4 weeks*

Subject is considered a  
nonrespondent
